# 1 Estimating heritability of complex traits in admixed 2 populations with summary statistics

3 Yang Luo<sup>1-5,\*</sup>, Xinyi Li<sup>1-5,\*</sup>, Xin Wang<sup>6</sup>, Steven Gazal<sup>3,7</sup>, Josep Maria Mercader<sup>3,8</sup>, 23andMe  
4 Research Team, SIGMA Type 2 Diabetes Consortium, Benjamin M. Neale<sup>3,9</sup>, Jose C.  
5 Florez<sup>3,8,10</sup>, Adam Auton<sup>6</sup>, Alkes L. Price<sup>3,7,11</sup>, Hilary K. Finucane<sup>3,#</sup>, Soumya Raychaudhuri<sup>1-5,12,#</sup>

## 7 Affiliations

8 <sup>1</sup>Division of Rheumatology, Immunology, and Allergy, Brigham and Women's Hospital, Harvard  
9 Medical School, Boston, MA, USA

10 <sup>2</sup>Division of Genetics, Brigham and Women's Hospital, Harvard Medical School, Boston, MA,  
11 USA

12 <sup>3</sup>Broad Institute of MIT and Harvard, Cambridge, MA, USA

13 <sup>4</sup>Department of Biomedical Informatics, Harvard Medical School, Boston, MA, USA

14 <sup>5</sup>Center for Data Sciences, Brigham and Women's Hospital, Harvard Medical School, Boston,  
15 MA 02115, USA

16 <sup>6</sup>23andMe, Inc., Mountain View, California, USA

17 <sup>7</sup>Department of Epidemiology, Harvard T.H. Chan School of Public Health, Boston,  
18 Massachusetts, USA

19 <sup>8</sup>Diabetes Unit and Center for Genomic Medicine, Massachusetts General Hospital,  
20 Boston, MA 02114, USA

21 <sup>9</sup>Analytic and Translational Genetics Unit, Massachusetts General Hospital and Harvard Medical  
22 School, Boston, MA, USA

23 <sup>10</sup>Department of Medicine, Harvard Medical School, Boston, MA 02115, USA

24 <sup>11</sup>Department of Biostatistics, Harvard T.H. Chan School of Public Health, Boston,  
25 Massachusetts, USA

26 <sup>12</sup>Arthritis Research UK Centre for Genetics and Genomics, Manchester Academic Health  
27 Science Centre, University of Manchester, Manchester, UK

28  
29 \*: These authors contributed equally to this work.

30 #: Correspondence should be addressed to H.K.F. ([finucane@broadinstitute.org](mailto:finucane@broadinstitute.org)) or S.R.

31 ([soumya@broadinstitute.org](mailto:soumya@broadinstitute.org)).

32

33

34 **All summary statistics-based methods to estimate the heritability of SNPs ( $h_g^2$ ) rely on**  
35 **accurate linkage disequilibrium (LD) calculations. In admixed populations, such as**  
36 **African Americans and Latinos, LD estimates are influenced by admixture and can result**  
37 **in biased  $h_g^2$  estimates. Here, we introduce covariate-adjusted LD score regression (cov-**  
38 **LDSC), a method to provide robust  $h_g^2$  estimates from GWAS summary statistics and in-**  
39 **sample LD estimates in admixed populations. In simulations, we observed that**  
40 **unadjusted LDSC underestimates  $h_g^2$  by 10%- 60%; in contrast, cov-LDSC is robust to all**  
41 **simulation parameters. We applied cov-LDSC to approximately 170,000 Latino, 47,000**  
42 **African American 135,000 European individuals in three quantitative and five**  
43 **dichotomous phenotypes. Our results show that most traits have high concordance of**  
44  **$h_g^2$  between ethnic groups; for example in the 23andMe cohort, estimates of  $h_g^2$  for BMI**  
45 **are  $0.22 \pm 0.01$ ,  $0.23 \pm 0.03$  and  $0.22 \pm 0.01$  in Latino, African American and European**  
46 **populations respectively. However, for age at menarche, we observe population specific**  
47 **heritability differences with estimates of  $h_g^2$  of  $0.10 \pm 0.03$ ,  $0.33 \pm 0.13$  and  $0.19 \pm 0.01$  in**  
48 **Latino, African American and European populations respectively.**

## 49 Introduction

50 To date, genome-wide association studies (GWAS) have identified thousands of loci associated  
51 with hundreds of complex human traits and diseases<sup>1</sup>. However, the majority of GWAS, and the  
52 analytical tools developed to analyze GWAS data, have been focused on relatively homogenous  
53 continental populations, and in particular populations of European descent<sup>2</sup>. Non-European  
54 populations, particularly those with mixed ancestral background such as African Americans and  
55 Latinos, have been relatively understudied; diversifying GWAS data and analysis is important  
56 not only to ensure that the benefits of GWAS are shared beyond individuals of European  
57 ancestry but also because multi-population studies are valuable in detecting novel disease

58 associations, fine-mapping to causal variants, and exploring the extent to which the underlying  
59 genetic basis is shared across populations<sup>3</sup>.  
60  
61 Investigators have developed statistical methods to estimate SNP-heritability ( $h_g^2$ ), that is the  
62 proportion of phenotypic variance explained by genotyped variants, from GWAS data<sup>4-6</sup>.  
63 Summary statistics-based methods to estimate heritability, such as Linkage Disequilibrium  
64 score regression (LDSC)<sup>5,7</sup> and its extensions<sup>5,7-9</sup>, have become particularly popular due to their  
65 computational efficiency, relative ease of application, and the requirement of only GWAS  
66 summary statistics rather than raw genotype data<sup>10</sup>. These methods have proven to be powerful  
67 tools in defining the genetic architecture of common traits<sup>11</sup>, distinguishing polygenicity from  
68 confounding<sup>5</sup>, establishing relationships between complex phenotypes<sup>8</sup> and defining key cell  
69 types and regulatory mechanisms of human diseases<sup>7,12,13</sup>. LDSC and other methods based on  
70 summary statistics, such as SumHer<sup>14</sup> implicitly rely on the assumptions that below a given  
71 distance threshold, typically set to one centimorgan (cM), in-sample LD can be well-  
72 approximated by reference panel LD, that beyond this threshold the in-sample LD between any  
73 two SNPs is independent of the distance between the SNPs and/or negligible, and that  
74 covariate adjustment does not have a large impact on in-sample LD. For studies of admixed  
75 populations, no reference panel has been shown to give a good representation of in-sample LD,  
76 LD continues to increase with distance well beyond 1-cM, and covariate adjustment has a large  
77 impact on in-sample LD. Thus, LDSC has not previously been applicable to admixed samples.

## 78 Results & Discussion

### 79 Overview of methods

80 In this work, we first examined the performance of LDSC in admixed populations and  
81 demonstrated that LDSC does indeed yield severely downward biased estimates of SNP-

82 heritability. Next, we extended the LDSC-based methods to admixed populations by introducing  
83 covariate-adjusted LDSC (cov-LDSC). Same as how summary statistics were computed, for  
84 each variant we regressed the global PCs, obtained within the GWAS samples, out of the raw  
85 genotype. LD scores were computed on the adjusted genotypes and used by LDSC to estimate  
86 heritability. Using covariate-adjusted in-sample LD to compute LD scores removes the issues of  
87 reference panel mismatch, long-distance admixture-LD, and covariate effects listed above, and  
88 produces robust estimates of heritability (**Method, Figure 1**).

89  
90 We demonstrated that cov-LDSC is robust to a wide range of simulation scenarios. We then  
91 applied it to approximately 8,000 Latinos from the Slim Initiative in Genomic Medicine for the  
92 Americas (SIGMA) Type 2 Diabetes (T2D) Consortium<sup>15</sup> and approximately 162,000, 47,000  
93 and 135,000 Latino, African Americans, and Europeans research participants, respectively, from  
94 the personal genetics company 23andMe. We analyzed three quantitative (body mass index,  
95 height and age at menarche), and five dichotomous phenotypes (type 2 diabetes (available in  
96 the SIGMA cohort only), left handedness, morning person, motion sickness and  
97 nearsightedness).

## 98 Robustness of LD score estimation

99 To demonstrate the effect of admixture on the stability of LD score estimates, we first calculated  
100 LD scores with genomic window sizes ranging from 0-50 cM in both European (EUR, N=503)  
101 and admixed American (AMR, N=347) populations from the 1000 Genomes Project<sup>16</sup>. As  
102 window size increases, we expect the mean LD score to reach a plateau because LD metrics  
103 should be negligible beyond a large enough genomic distance. If the mean LD score does not  
104 reach a plateau, but instead continues to increase with increasingly large window sizes, it may  
105 indicate one of two possibilities. Either (1) the window is too small to capture all of the LD or (2)  
106 the LD scores are capturing long-range pairwise SNP correlations arising from admixture; if this

107 increase is non-linear then there is non-negligible distance-dependent LD, violating LDSC  
108 assumptions. Examining unadjusted LD scores, we observed that in the EUR<sup>5</sup>, the mean LD  
109 score estimates were stable with windows beyond 1-cM in size, as previously reported.  
110 However, in the AMR population the mean LD score estimates continued to increase concavely  
111 with increasing window size. In contrast, when we applied cov-LDSC with 10 PCs to calculate  
112 covariate adjusted LD scores, we observed that LD score estimates plateaued for both EUR  
113 and AMR at a 1-cM and 20-cM window size respectively (<1% increase per cM,  
114 **Supplementary Table 1**). This suggests that cov-LDSC is able to correct the long-range LD  
115 due to admixture and yield stable estimates of LD scores (**Method, Supplementary Figure 1**),  
116 and also that cov-LDSC is applicable in homogeneous populations (**Supplementary Table 1**).  
117 The larger window size for the AMR population is needed due to residual LD caused by recent  
118 admixture. We next tested the sensitivity of the LD score estimates with regard to the number of  
119 PCs included in the cov-LDSC. We observed that in the AMR panel, where the top two PCs  
120 capture 60.4% of variability in the data, LD score estimates are robust to different additional  
121 numbers of PCs and different window sizes 20-cM (**Supplementary Figure 2**).

## 122 Simulations with simulated genotypes

123 To assess whether cov-LDSC produces unbiased estimates of  $h_g^2$ , we first simulated  
124 genotypes of admixed individuals (**Methods**). We simulated genotypes of 10,000 unrelated  
125 diploid individuals for approximately 400,000 common SNPs on chromosome 2 in a coalescent  
126 framework using msprime<sup>17</sup>. First, we tested LDSC and cov-LDSC with different admixture  
127 proportions between two ancestral populations, and a quantitative phenotype with a  $h_g^2$  of 0.4  
128 using an additive model (**Methods**). We observed that as the proportion of admixture increases,  
129  $\hat{h}_g^2$  for LDSC increasingly underestimates true  $h_g^2$  by as much as 18.6%. In marked contrast,

130 cov-LDSC produced consistently unbiased estimates regardless of admixture proportion  
131 **(Supplementary Figure 3a).**

132  
133 Second, we varied the percentage of causal variants from 0.01% to 50% in a polygenic  
134 quantitative trait with  $h_g^2 = 0.4$  in a population with a fixed admixture proportion of 50%. LDSC  
135 again consistently underestimated  $h_g^2$  by 12%-18.6%. In contrast, cov-LDSC yielded unbiased  
136 estimates regardless of the percentage of causal variants **(Supplementary Figure 3b).**

137  
138 Third, we assessed the robustness of LDSC and cov-LDSC for different assumed total  $h_g^2$   
139 (0.05, 0.1, 0.2, 0.3, 0.4 and 0.5). At each  $h_g^2$  value, LDSC underestimated by 11.5%-19.6%.  
140 Using cov-LDSC, while standard error increases with  $h_g^2$ , the point estimates remain unbiased  
141 **(Supplementary Figure 3c).**

142  
143 Fourth, we included an environmental stratification component aligned with the first PC of the  
144 genotype data **(Methods)**, and concluded that cov-LDSC is also robust to confounding  
145 **(Supplementary Figure 3d).**

146  
147 Finally, to assess the performance of cov-LDSC in polygenic binary phenotypes, we simulated  
148 studies of a binary trait with a prevalence of 0.1 using simulated genotypes and a liability  
149 threshold model **(Methods)**. We showed that cov-LDSC provided robust estimates in case-  
150 control studies with the same four simulation scenarios **(Supplementary Figure 4)**. In contrast,  
151 LDSC underestimated heritability for binary phenotypes in the same way as it did for  
152 quantitative phenotypes.

## 153 Simulations with real genotypes

154 We next examined the performance of both unadjusted LDSC and cov-LDSC on real genotypes  
155 of individuals from admixed populations. We obtained data from the SIGMA cohort, which  
156 includes 8,214 Mexican and other Latino individuals. Using ADMIXTURE<sup>18</sup> and populations from  
157 the 1000 Genomes Project as reference panels, we observed that each individual in the SIGMA  
158 cohort has a varying degree of admixture proportion (**Supplementary Figure 5**). As in the AMR  
159 panel, we observed that using a 20-cM window, LD score estimates plateaued in SIGMA  
160 (**Supplementary Figure 6, Supplementary Table 2**), and were robust to different number of  
161 PCs (**Supplementary Figure 7**). We subsequently used a 20-cM window and 10 PCs in all  
162 simulations. We observed that cov-LDSC yielded unbiased estimates in traits with different  
163 polygenic genetic architectures by varying the number of causal variants and varying the total  
164 heritabilities (**Figure 2a-b**). In contrast LDSC underestimated heritability by as much as 62.5%.  
165 To examine the performance of cov-LDSC in the presence of environmental confounding  
166 factors, we simulated an environmental stratification component aligned with the first PC of the  
167 genotype data, representing European v.s. Native American ancestry. In this simulation  
168 scenario, cov-LDSC still provides unbiased  $h_g^2$  estimates (**Figure 2c**). Intercepts of all the  
169 simulation scenarios are close to 1, suggesting that we had adequately controlled for  
170 confounding from population stratification and cryptic relatedness (**Supplementary Figure 8a-**  
171 **c**).

172  
173 Thus far, we have used cov-LDSC by calculating LD scores on the same set of samples that  
174 were used for association studies (in-sample LD scores). In practical applications, computing LD  
175 scores on the whole data set can be computationally expensive and difficult to obtain, and so  
176 we investigated computing LD scores on a subset of samples. To investigate the minimum  
177 number of samples required to obtain accurate in-sample LD scores, we computed LD scores

178 on subsamples of 100, 500, 1,000 and 5,000 individuals from a GWAS of 10,000 simulated  
179 genotypes. We also tested out-of-sample LD scores from 1,000 samples with a perfectly  
180 matching demographic history in the simulated genotypes. cov-LDSC yielded unbiased  
181 estimates for in-sample LD scores calculated using 1,000 samples (>10% of the total sample  
182 size) and also using 1,000 samples in an out-of-sample reference panel with a perfectly  
183 matching population structure (**Supplementary Figure 9**). We repeated these analyses in  
184 simulated phenotypes in the SIGMA cohort. We subsampled the SIGMA cohort, and obtained  
185 unbiased estimates when using as few as 1,000 samples (**Figure 2d**). When using the AMR  
186 panel as a reference panel for the SIGMA cohort, we observed an unbiased  $h_g^2$  estimate (  
187  $p = 0.33$ , **Figure 2d**). This suggests that the AMR panel included in the 1000 Genomes Project  
188 has similar demographic history compared to the SIGMA cohort (**Supplementary Figure 5**).  
189 However, as the number of samples included in the subsampling decreased, the cov-LDSC  
190 regression intercepts deviated further from 1 (**Supplementary Figure 8d**), probably due to  
191 attenuation bias from noisily estimated LD scores at  $N < 1,000$ . We therefore caution that when  
192 using 1000 Genomes or any out-of-sample reference panels for a specific admixed cohort,  
193 users should ensure that the demographic histories are shared between the reference and the  
194 study cohort. We recommend computing in-sample LD scores on a randomly chosen subset of  
195 at least 1,000 individuals from a GWAS.

## 196 Application to SIGMA and 23andMe cohorts

197 We next estimated  $h_g^2$  of height, BMI and T2D phenotypes included in the SIGMA cohort of  
198 8,214 samples and 943,244 variants (**Methods**) using cov-LDSC (**Table 1**). We estimated  $h_g^2$   
199 of height, BMI and T2D to be  $0.38 \pm 0.08$ ,  $0.25 \pm 0.06$  and  $0.26 \pm 0.08$  respectively. These  
200 results are similar to what has been reported in the UK Biobank<sup>19</sup> and other studies<sup>4,20</sup> for  
201 European populations. Although estimates differ in different studies (**Methods**), we noted that



202 without cov-LDSC, we would have obtained severely deflated estimates (**Table 1**). To confirm  
203 that our reported heritability estimates are robust under different model assumptions, we applied  
204 an alternative approach based on REML in the linear mixed model framework implemented in  
205 GCTA<sup>21</sup>. To avoid biases introduced from calculating genetic relatedness matrices (GRMs) in  
206 admixed individuals, we obtained a GRM based on an admixture-aware relatedness estimation  
207 method REAP<sup>22</sup> (Methods). GCTA-based results were similar to reported  $h_g^2$  estimates from  
208 cov-LDSC, indicating our method is able to provide reliable  $h_g^2$  estimates in admixed  
209 populations (**Table 1**).

210  
211 We then applied both LDSC and cov-LDSC to 161,894 Latino, 46,844 African American and  
212 134,999 European research participants from 23andMe, analyzing three quantitative and four  
213 dichotomous phenotypes (**Methods**). In this setting, using summary statistic methods to  
214 estimate heritability was essential since the dataset was too computationally expensive to apply  
215 genotype-based strategies. We used a 20-cM window and 10 PCs in LD score calculations for  
216 both populations (**Supplementary Figure 10**). LDSC and cov-LDSC produced similar  
217 heritability estimates in the European population, whereas in the admixed populations, LDSC  
218 consistently provided low estimates of  $h_g^2$  (**Supplementary Table 3**). For each phenotype, we  
219 estimated  $h_g^2$  using the same population-specific in-sample LD scores. For most phenotypes,  
220 the reported  $h_g^2$  is similar among the three ethnic groups with a notable exception for age at  
221 menarche (**Figure 3**), suggesting possible differences ( $p = 7.1 \times 10^{-3}$  between Latinos and  
222 Europeans) in the genetic architecture of these traits between different ethnic groups. It has  
223 been long established that there is population variation in the timing of menarche<sup>23,24</sup>. Early  
224 menarche might influence the genetic architecture of other medically relevant traits since early  
225 age at menarche is associated with a variety of chronic diseases such as childhood obesity,  
226 coronary heart disease and breast cancer<sup>25,26</sup>. These results highlight the importance of

227 including diverse populations in genetic studies in order to enhance our understanding of  
228 complex traits that show differences in their genetic heritability.

## 229 Conclusion

230 As we expand genetic studies to explore admixed populations around the world, extending  
231 statistical genetics methods to make inferences within admixed populations is crucial. This is  
232 particularly true for methods based on summary statistics, which are dependent on the use of  
233 LD scores, which we showed to be problematic in admixed populations. In this study, we  
234 demonstrated that original LDSC and other summary statistics-based methods, such as  
235 PCGCs<sup>27</sup> and SumHer<sup>28</sup>, that were originally designed for homogenous populations, potentially  
236 severely underestimated heritability in admixed populations. We introduced cov-LDSC which  
237 regresses out global PC on individual genotypes during the LD score calculation, and showed it  
238 can yield robust LD score and heritability estimates in both homogenous and admixed  
239 populations.

240  
241 By applying cov-LDSC to Europeans, African Americans, and Latin Americans in the 23andMe  
242 cohort, we observed evidence of heritability differences across different populations. These  
243 differences highlight the importance of studying diverse populations. How these differences may  
244 correspond to differences in biological mechanisms may lead to mechanistic insights about the  
245 phenotype. One strategy to do this, which we will explore in the future is to extend cov-LDSC to  
246 partition heritability by different functional annotations and cell types to dissect the genetic  
247 architecture in admixed populations.

248  
249 Although our work provided a novel approach to estimate genetic heritability using summary  
250 statistics in admixed populations, it has a few limitations (**Methods**). First, covariates included in  
251 the summary statistics should match the covariates included in the covariate-adjusted LD score

252 calculations (**Supplementary Figure 11**), and  $h_g^2$  estimates in admixed populations are more  
253 sensitive to their matching LD reference panels. Unmatched reference panels are likely to  
254 produce biased estimates<sup>29,30</sup>. We therefore advise to compute in-sample LD scores from the  
255 full or a random subset of data ( $N > 1,000$ ) used to generate the GWAS summary statistics when  
256 possible. Second, when applying cov-LDSC to imputed variants, particularly those with lower  
257 imputation accuracy (INFO < 0.99), we caution that the heritability estimates can be influenced  
258 by an imperfect imputation reference panel, especially in Latino populations<sup>31,32</sup>. To limit the bias  
259 in varying genotyping array and imputation quality in studied admixed cohorts, we recommend  
260 restricting the heritability analyses to common HapMap3 variants. And any extension to a larger  
261 set of genetic variants, especially across different cohorts should be performed with caution.  
262 Third, recent studies have shown that heritability estimates can be sensitive to the choice of the  
263 frequency-dependent heritability model<sup>6,9,14</sup>. However, this is unlikely to impact the main  
264 conclusions of the current study<sup>9</sup> and how to incorporate ancestry-dependent frequencies in the  
265 LD-dependent annotation remains a subject of future study (**Methods**).

266  
267 Despite these limitations, in comparison with other methods, such as those based on restricted  
268 maximum likelihood estimation (REML)<sup>21</sup> with an admixture-aware GRM, for estimating  $h_g^2$  in  
269 admixed populations or those with intra-population structure, cov-LDSC has a number of  
270 attractive properties. First, covariate-adjusted in-sample LD scores only need to be calculated  
271 once per cohort and can be obtained with a subset of samples. This is particularly useful in  
272 large cohorts such as 23andMe and UK Biobank<sup>33</sup>, where multiple phenotypes have been  
273 collected per individual. In this setting, per-trait heritability can be estimated based on the same  
274 LD scores. Second, as a generalized form of LDSC, it is robust to population stratification and  
275 cryptic relatedness in both homogenous and admixed populations. Third, similar to the original  
276 LDSC methods, cov-LDSC may be extended to perform analyses such as estimating genetic

277 correlations, partitioning  $h_g^2$  by functional annotations, identifying disease-relevant tissues and  
278 cell types and multi-trait analysis<sup>7,34,35</sup>.

279

## 280 Methods

### 281 Mathematical framework

282 The main LD score regression<sup>5</sup> draws a linear model between  $\chi^2$  statistics and heritability  $h_g^2$  :

$$E[\chi^2_j] = \frac{N h_g^2}{M} l_j + N a + 1$$

283

284 where  $N$  is number of samples;  $M$  is number of SNPs;  $a$  measures the confounding biases

285 including cryptic relatedness and population stratification; and  $l_j$  is LD score of variant  $j$ .

286 measured as:

$$287 \quad l_j = \sum_{k=1}^M r_{jk}^2 .$$

288 Let  $X_{ij}$  be the genotype of individual  $i$  at SNP  $j$ , standardized that  $\widehat{X}_{ij}$  has mean 0 variance 1 for

289 each SNP. In the original LD score regression, the in-sample correlation  $\widehat{r}_{jk}$  between SNP  $j$  and

290 SNP  $k$  is defined as:

$$291 \quad \widehat{r}_{jk} = \frac{1}{N} \widehat{X}_j^T \widehat{X}_k .$$

292 We introduced cov-LDSC for admixed populations. The intuition of cov-LDSC is to regress out

293 the ancestral or any other fix effects for each SNP  $j$  from its genotype. Define  $C_i$  as the covariate

294 or top principal components of individual  $i$ . We adjusted the standardized  $\widehat{X}$  matrix to  $X'$  by

295 continuously subtracting the projection of covariate from raw genotypes

$$296 \quad X' = \widehat{X} - C C^T \widehat{X} .$$

297 We then standardized  $X'$  to be mean 0 and variance 1 for each SNP, denoted as  $\hat{X}'$ . Based on  
298 the adjusted genotypes  $\hat{X}'$ , we measure in-sample cov-LD score  $\hat{r}'_{jk}$  in admixed populations:

299 
$$\hat{r}'_{jk} = \frac{1}{N} \hat{X}'_j{}^T \hat{X}'_k$$

## 300 Window size and number of PCs in LD score calculations

301 To determine the optimal window size for estimating LD scores, we examined the effect of  
302 varying the genomic window size for both simulated and real data sets. We concluded that LD  
303 score estimates were robust to the choice of window size if the increase in the mean LD score  
304 estimates was less than 1% per cM beyond a given window. Using this criterion, we used  
305 window sizes of 5-cM and 20-cM for the simulated and real genotypes respectively  
306 (**Supplementary Table 2, 4-5**). We also calculated the squared correlations between LD score  
307 estimates using the chosen window size and other LD score estimates with window sizes larger  
308 than the chosen window. The squared correlations were greater than 0.99 in all cases  
309 (**Supplementary Table 6-8**) indicating the LD score estimates were robust at the chosen  
310 window sizes.

311  
312 Similarly, to determine the number of PCs needed to be included in the GWAS association tests  
313 and cov-LDSC calculations, we examined the effect of varying the genomic window size using  
314 different numbers of PCs. The number of PCs that needs to be included for covariate  
315 adjustment depends on the population structure for different datasets. In practice, we  
316 recommend using the same number of PCs to adjust for the GWAS association tests and for LD  
317 score calculations (**Supplementary Figure 11**).

318

## 319 Genotype simulations

320 We used msprime<sup>17</sup> version 0.6.1 to simulate population structure with mutation rate  $2 \times 10^{-8}$   
321 and recombination maps from the HapMap Project<sup>36</sup>. The demographic model was adapted  
322 from Mexican migration history<sup>37</sup> and the parameters were previously inferred from the 1000  
323 Genomes Project<sup>16</sup>. We assumed the admixture event happened approximately 500 years ago  
324 to mirror the European colonization of the Americas. We set different admixture proportions to  
325 reflect different admixed populations. In each population, 10,000 individuals were simulated  
326 after removing second degree related samples (kinship > 0.125) using KING<sup>38</sup>.

327

328 We applied single-variant linear models for quantitative traits and logistic models for binary trait  
329 both with 10 PCs as covariates in association analyses using PLINK 1.90.

## 330 Phenotype simulations

331 We used two phenotype simulation strategies implemented in the GCTA<sup>21</sup> and the baseline  
332 model<sup>7</sup> respectively. These two strategies assume different genetic architectures of complex  
333 traits. In the GCTA model, all variants are equally likely to be causal independent of their  
334 functional or minor allele frequency (MAF) structure. On the other hand the baseline model  
335 incorporates functionally dependent architectures. Briefly, it includes 53 annotations overlapping  
336 genome-wide functional annotations (e.g. coding, conserved, regulatory). All causal variants  
337 were generated among common observed variants with MAF > 5% (~40,000 SNPs in simulated  
338 genotypes and 943,244 SNPs in SIGMA cohort).

339

340 Both models assume an additive genetic model  $Y_j = W_{ij}\beta_i + \epsilon_j$ , where  $Y_j$  is the phenotype for  
341 the  $j^{th}$  individual;  $W_{ij} = \frac{X_{ij} - 2p_i}{\sqrt{2p_i(1-2p_i)}}$  is the standardized genotype of  $X_{ij}$  for the  $i^{th}$  causal variant  
342 (with MAF  $\geq 5\%$ ) of the  $j^{th}$  individual and  $p_i$  being the frequency of the  $i^{th}$  causal variant.  $\beta_j$  is  
343 the allelic effect of the standardized genotype of the  $j^{th}$  causal variant and  $\epsilon_j$  is the residual

344 effect generated from a normal distribution with mean 0 and variance  $\sigma_e^2$ . In the GCTA model,  
345 the standardized casual effect size variance is constant, i.e.  $var(\beta_j) = h_g^2/M$ , whereas in the  
346 baseline model  $var(\beta_j) = \sum_C a_c(j) \tau_c$ , where  $a_c(j)$  is the value of annotation  $a_c$  at variant  $j$  and  
347  $\tau_c$  represents the per-variant contribution, of one unit of the annotation  $a_c$ , to heritability.

348

349 We used recommended parameters in both strategies and applied it in all simulation scenarios  
350 in the SIGMA cohort and observed no significant differences in heritability estimates

351 **(Supplementary Table 9)**. In all simulations, we restricted ourselves to genotyped SNPs with  
352  $MAF \geq 5\%$  as recommended in previous studies<sup>6,7</sup>. We concluded that the total genetic  
353 heritability estimated using cov-LDSC is robust under both models in all simulation scenarios.

354

355 For case-control simulations, we adopted a liability threshold model with disease prevalence  
356 0.1. 5,000 cases and 5,000 controls were obtained for each simulation scenario. To represent  
357 environmental stratification, similar to previously described<sup>5</sup>, we added 0.2 \* standardized first  
358 principal component to the standardized phenotypes. .

## 359 LD score estimates

360 We calculated in-sample LD scores using both a non-stratified LD score model and baseline  
361 model<sup>7</sup>. We used the 53 non-frequency dependent annotations included the baseline model to  
362 estimate  $h_g^2$  in the 23andMe research database and the SIGMA cohort.  $h_g^2$  estimates of three  
363 quantitative traits and five binary traits were robust when using different LD models

364 **(Supplementary Table 3)**. We recognized recent studies have shown that genetic heritability  
365 can be sensitive to the choice of LD-dependent heritability model<sup>6,9</sup>. However, in the admixed  
366 population, it is complicated to create LD-related annotations that are independent from  
367 admixture-LD. We would need a larger and denser admixed sequencing panel to evaluate the

368 performance of baseline-LD model in admixed populations. Regardless, this should not impact  
369 the result of current study, where we reported the total phenotypic variation that can be  
370 explained by common HapMap3 variants<sup>9</sup>.

371

## 372 Slim Initiative in Genomic Medicine for the Americas (SIGMA)

### 373 Type 2 Diabetes (T2D) cohort

374 8,214 Mexican and other Latin American samples were genotyped with Illumina HumanOmni2.5  
375 array. The genotyped data were pre-phased using SHAPEIT2<sup>39</sup>. IMPUTE2<sup>40</sup> was then used to  
376 impute genotypes at untyped genetic variants using the 1000 Genomes Project Phase 3<sup>16</sup>  
377 dataset as a reference panel. We merged genotyped SNPs and imputed variants with INFO  
378 >0.99. Merged sets of SNPs were further filtered to be HapMap3 variants with MAF >5% and  
379 SNPs in high LD regions were removed. After QC, 8,214 individuals and 943,244 SNPs  
380 remained. We examined three phenotypes from the SIGMA cohort: height, BMI, and type 2  
381 diabetes. For each phenotype, we included age, sex, and the first 10 PCs as fixed effects in the  
382 association analyses.

383

384 We removed high LD regions (**Supplementary Table 10**) and used a 20-cM window and 10  
385 PCs in all scenarios.  $h_g^2$  estimates were robust at a 20-cM window with 10 PCs when using  
386 cov-LDSC (**Supplementary Figure 12**) with an assumed prevalence of 0.144<sup>15</sup>. Intercepts of all  
387 described simulated scenarios are shown in **Supplementary Figure 8**.

### 388 23andMe cohort

389 All participants were drawn from the customer base of 23andMe, Inc., a direct to consumer  
390 genetics company. Participants provided informed consent and participated in the research



391 online, under a protocol approved by the external AAHRPP-accredited IRB, Ethical &  
392 Independent Review Services ([www.eandireview.com](http://www.eandireview.com)). Samples from 23andMe were then  
393 chosen from consented individuals who were genotyped successfully on the v5 platform, an  
394 Illumina Infinium Global Screening Array (~640,000 SNPs) supplemented with ~50,000 SNPs of  
395 custom content. Participants were restricted to a set of individuals who have European, African  
396 American, or Latino ancestry determined through an analysis of local ancestry<sup>41</sup>.

397  
398 To compute LD scores, both genotyped and imputed SNPs were used. Genotype variants were  
399 filtered to have genotype call rate > 90%, self-chain score = 0, further restricted to eliminate  
400 those with strong evidence of Hardy Weinberg disequilibrium ( $p > 10^{-20}$ ), and passing a parent-  
401 offspring transmission test. Imputed variants used a reference panel that combined the May  
402 2015 release of the 1000 Genomes Phase 3 haplotypes<sup>16</sup> with the UK10K imputation reference  
403 panel<sup>42</sup>. Imputed dosages were rounded to the nearest integer (0, 1, 2) for downstream  
404 analysis. Variants were filtered to have imputation r-squared > 0.9. Both genotyped and imputed  
405 variants were also filtered for batch effects and sex dependent effects. To minimize rounding  
406 inaccuracies, genotyped SNPs were prioritized over imputed SNPs in the merged SNP set. The  
407 merged SNP set were further restricted to HapMap3 variants with MAF  $\geq 0.05$ . We have  
408 measured LD scores in a subset of African Americans (61,021) and Latinos (9,990) on  
409 chromosome 2 with different window sizes from 1-cM to 50-cM (**Supplementary Table 5**) and  
410 squared correlation between different window sizes (**Supplementary Table 8**). All LD scores  
411 were computed with a 20-cM window.

412  
413 In genome-wide association analyses, for each population, a maximal set of unrelated  
414 individuals was chosen for each analysis using a segmental identity-by-descent (IBD) estimation  
415 algorithm<sup>43</sup>. Individuals were defined as related if they shared more than 700-cM IBD.

416

417 All association tests were performed using linear regression model for quantitative traits and  
418 logistic regression model for binary traits assuming additive allelic effects. We included  
419 covariates for age, sex and the top 10 PCs to account for residual population structure. Details  
420 of phenotypes and genotypes are listed in **Supplementary Table 11**.

## 421 $h_g^2$ versus $h_{common}^2$

422 The quantity ( $h_g^2$ ) we reported in the main analysis is defined as heritability tagged by HapMap3  
423 variants with MAF  $\geq 5\%$ , including tagged causal effects of both low-frequency and common  
424 variants. This quantity is different from  $h_{common}^2$ , the heritability causality explained by all  
425 common SNPs excluding tagged causal effects of low-frequency variants, reported in the  
426 original LDSC<sup>5</sup>. When applying LDSC to Europeans and other homogeneous populations, it is  
427 recommended to use an appropriate sequenced reference panel, such as 1000 Genome  
428 Project, which includes >99% of the SNPs with frequency >1%<sup>16</sup>, which allows for the estimation  
429 of  $h_{common}^2$ . However, in-sample sequence data is usually not available for an admixed GWAS  
430 cohort, and so cov-LDSC can only include genotyped SNPs in the reference panel, and thus  
431 can only estimate the heritability tagged by a given set of genotyped SNPs. In order to compare  
432 the same quantity across cohorts, we recommend to use common HapMap3 SNPs (MAF  $\geq 5\%$ )  
433 for in-sample LD reference panel calculation, since most of them should be well imputed for a  
434 genome-wide genotyping array. To quantify the difference between  $h_g^2$  and  $h_{common}^2$ , we used  
435 all well imputed (INFO>0.99, **Methods**) SNPs (~6.9 million) in SIGMA cohort as reference panel  
436 and reported  $h_{common}^2$ , to approximate what the estimate of  $h_{common}^2$  would have been with a  
437 sequenced reference panel (**Supplementary Table 12**). The difference that we observed is  
438 consistent with the previous discovery that the low frequency variants (0.5%<MAF<5%) explains  
439  $6.3 \pm 0.2 \times$  (15.87%) of heritability less than common variants (MAF $\geq 5\%$ ) on average<sup>44</sup>.

## 440 URLs

- 441 cov-LDSC software and tutorials, <https://github.com/immunogenomics/cov-ldsc>
- 442 msprime, <https://pypi.python.org/pypi/msprime>;
- 443 GCTA, <http://cnsgenomics.com/software/gcta/>;
- 444 LDSC, <https://github.com/bulik/ldsc/>;
- 445 PLINK 1.90, <https://www.cog-genomics.org/plink2>;
- 446 REAP v1.2, <http://faculty.washington.edu/tathornt/software/REAP/download.html>;
- 447 ADMIXTURE v1.3.0, <http://www.genetics.ucla.edu/software/admixture/download.html>;

## 448 Acknowledgements

449 The study was supported by the National Institutes of Health (NIH) TB Research Unit Network,  
450 Grant U19 AI111224-01. The content is solely the responsibility of the authors and does not  
451 necessarily represent the official views of the NIH.

452

453 We thank the research participants and employees of 23andMe for their contribution to this  
454 study.

## 455 Author contributions

456 Y.L., X.L, H.K.F and S.R. conceived and supervised the study. Y.L. and X.L. analyzed data.  
457 X.W. and A.A. contributed and analyzed the 23andMe data. S.G., B.M.N. and A.L.P. gave  
458 critical feedback on LDSC and statistical models. J.M.M. and J.C.F. contributed the SIGMA  
459 study. All authors contributed to the writing of this manuscript.

460

461 Members of the 23andMe Research Team:

462 Michelle Agee, Babak Alipanahi, Robert K. Bell, Katarzyna Bryc, Sarah L. Elson, Pierre  
463 Fontanillas, Nicholas A. Furlotte, Barry Hicks, David A. Hinds, Karen E. Huber, Ethan M. Jewett,  
464 Yunxuan Jiang, Aaron Kleinman, Keng-Han Lin, Nadia K. Litterman, Matthew H. McIntyre,  
465 Kimberly F. McManus, Joanna L. Mountain, Elizabeth S. Noblin, Carrie A.M. Northover, Steven

466 J. Pitts, G. David Poznik, J. Fah Sathirapongsasuti, Janie F. Shelton, Suyash Shringarpure,  
467 Chao Tian, Joyce Y. Tung, Vladimir Vacic, and Catherine H. Wilson.

## 468 Competing Financial interests

469 X.W., A.A. and members of the 23andMe Research Team are employees of 23andMe, Inc., and  
470 hold stock or stock options in 23andMe.

## 471 References

- 472 1. Visscher, P. M. *et al.* 10 Years of GWAS Discovery: Biology, Function, and Translation.  
473 *Am. J. Hum. Genet.* **101**, 5–22 (2017).
- 474 2. Popejoy, A. B. & Fullerton, S. M. Genomics is failing on diversity. *Nature* **538**, 161–164  
475 (2016).
- 476 3. Seldin, M. F., Pasaniuc, B. & Price, A. L. New approaches to disease mapping in admixed  
477 populations. *Nat. Rev. Genet.* **12**, 523–528 (2011).
- 478 4. Yang, J. *et al.* Common SNPs explain a large proportion of the heritability for human height.  
479 *Nat. Genet.* **42**, 565–569 (2010).
- 480 5. Bulik-Sullivan, B. K. *et al.* LD Score regression distinguishes confounding from polygenicity  
481 in genome-wide association studies. *Nat. Genet.* **47**, 291–295 (2015).
- 482 6. Speed, D. *et al.* Reevaluation of SNP heritability in complex human traits. *Nat. Genet.* **49**,  
483 986–992 (2017).
- 484 7. Finucane, H. K. *et al.* Partitioning heritability by functional annotation using genome-wide  
485 association summary statistics. *Nat. Genet.* **47**, 1228–1235 (2015).
- 486 8. Bulik-Sullivan, B. *et al.* An atlas of genetic correlations across human diseases and traits.  
487 *Nat. Genet.* **47**, 1236–1241 (2015).
- 488 9. Gazal, S. *et al.* Linkage disequilibrium-dependent architecture of human complex traits

- 489 shows action of negative selection. *Nat. Genet.* **49**, 1421–1427 (2017).
- 490 10. Pasaniuc, B. & Price, A. L. Dissecting the genetics of complex traits using summary  
491 association statistics. *Nat. Rev. Genet.* **18**, 117–127 (2017).
- 492 11. Evans, L. M. *et al.* Comparison of methods that use whole genome data to estimate the  
493 heritability and genetic architecture of complex traits. *Nat. Genet.* **50**, 737–745 (2018).
- 494 12. Finucane, H. K. *et al.* Heritability enrichment of specifically expressed genes identifies  
495 disease-relevant tissues and cell types. *Nat. Genet.* **50**, 621–629 (2018).
- 496 13. Guo, J., Yang, J. & Visscher, P. M. Leveraging GWAS for complex traits to detect  
497 signatures of natural selection in humans. *Curr. Opin. Genet. Dev.* **53**, 9–14 (2018).
- 498 14. Speed, D. & Balding, D. J. SumHer better estimates the SNP heritability of complex traits  
499 from summary statistics. *Nat. Genet.* (2018). doi:10.1038/s41588-018-0279-5
- 500 15. SIGMA Type 2 Diabetes Consortium *et al.* Sequence variants in SLC16A11 are a common  
501 risk factor for type 2 diabetes in Mexico. *Nature* **506**, 97–101 (2014).
- 502 16. 1000 Genomes Project Consortium *et al.* A global reference for human genetic variation.  
503 *Nature* **526**, 68–74 (2015).
- 504 17. Kelleher, J., Etheridge, A. M. & McVean, G. Efficient Coalescent Simulation and  
505 Genealogical Analysis for Large Sample Sizes. *PLoS Comput. Biol.* **12**, e1004842 (2016).
- 506 18. Alexander, D. H., Novembre, J. & Lange, K. Fast model-based estimation of ancestry in  
507 unrelated individuals. *Genome Res.* **19**, 1655–1664 (2009).
- 508 19. Ge, T., Chen, C.-Y., Neale, B. M., Sabuncu, M. R. & Smoller, J. W. Phenome-wide  
509 heritability analysis of the UK Biobank. *PLoS Genet.* **13**, e1006711 (2017).
- 510 20. Xue, A. *et al.* Genome-wide association analyses identify 143 risk variants and putative  
511 regulatory mechanisms for type 2 diabetes. *Nat. Commun.* **9**, 2941 (2018).
- 512 21. Yang, J., Lee, S. H., Goddard, M. E. & Visscher, P. M. GCTA: a tool for genome-wide  
513 complex trait analysis. *Am. J. Hum. Genet.* **88**, 76–82 (2011).
- 514 22. Thornton, T. *et al.* Estimating Kinship in Admixed Populations. *Am. J. Hum. Genet.* **91**,

- 515 122–138 (2012).
- 516 23. Demerath, E. W. *et al.* Genome-wide association study of age at menarche in African-  
517 American women. *Hum. Mol. Genet.* **22**, 3329–3346 (2013).
- 518 24. Fernández-Rhodes, L. *et al.* The genetic underpinnings of variation in ages at menarche  
519 and natural menopause among women from the multi-ethnic Population Architecture using  
520 Genomics and Epidemiology (PAGE) Study: A trans-ethnic meta-analysis. *PLoS One* **13**,  
521 e0200486 (2018).
- 522 25. Canoy, D. *et al.* Age at menarche and risks of coronary heart and other vascular diseases  
523 in a large UK cohort. *Circulation* **131**, 237–244 (2015).
- 524 26. Bodicoat, D. H. *et al.* Timing of pubertal stages and breast cancer risk: the Breakthrough  
525 Generations Study. *Breast Cancer Res.* **16**, R18 (2014).
- 526 27. Weissbrod, O., Flint, J. & Rosset, S. Estimating SNP-Based Heritability and Genetic  
527 Correlation in Case-Control Studies Directly and with Summary Statistics. *Am. J. Hum.*  
528 *Genet.* **103**, 89–99 (2018).
- 529 28. Speed, D. & Balding, D. Better estimation of SNP heritability from summary statistics  
530 provides a new understanding of the genetic architecture of complex traits. *bioRxiv* 284976  
531 (2018). doi:10.1101/284976
- 532 29. Yang, J. *et al.* Genome-wide genetic homogeneity between sexes and populations for  
533 human height and body mass index. *Hum. Mol. Genet.* **24**, 7445–7449 (2015).
- 534 30. Yang, J., Zeng, J., Goddard, M. E., Wray, N. R. & Visscher, P. M. Concepts, estimation and  
535 interpretation of SNP-based heritability. *Nat. Genet.* **49**, 1304–1310 (2017).
- 536 31. Martin, A. R. *et al.* Human Demographic History Impacts Genetic Risk Prediction across  
537 Diverse Populations. *Am. J. Hum. Genet.* **100**, 635–649 (2017).
- 538 32. Nelson, S. C. *et al.* Improved imputation accuracy in Hispanic/Latino populations with larger  
539 and more diverse reference panels: applications in the Hispanic Community Health  
540 Study/Study of Latinos (HCHS/SOL). *Hum. Mol. Genet.* **25**, 3245–3254 (2016).

- 541 33. Sudlow, C. *et al.* UK biobank: an open access resource for identifying the causes of a wide  
542 range of complex diseases of middle and old age. *PLoS Med.* **12**, e1001779 (2015).
- 543 34. Turley, P. *et al.* Multi-trait analysis of genome-wide association summary statistics using  
544 MTAG. *Nat. Genet.* (2018). doi:10.1038/s41588-017-0009-4
- 545 35. Gusev, A. *et al.* Partitioning heritability of regulatory and cell-type-specific variants across  
546 11 common diseases. *Am. J. Hum. Genet.* **95**, 535–552 (2014).
- 547 36. International HapMap Consortium. The International HapMap Project. *Nature* **426**, 789–796  
548 (2003).
- 549 37. Gutenkunst, R. N., Hernandez, R. D., Williamson, S. H. & Bustamante, C. D. Inferring the  
550 joint demographic history of multiple populations from multidimensional SNP frequency  
551 data. *PLoS Genet.* **5**, e1000695 (2009).
- 552 38. Manichaikul, A. *et al.* Robust relationship inference in genome-wide association studies.  
553 *Bioinformatics* **26**, 2867–2873 (2010).
- 554 39. O’Connell, J. *et al.* A general approach for haplotype phasing across the full spectrum of  
555 relatedness. *PLoS Genet.* **10**, e1004234 (2014).
- 556 40. Howie, B., Fuchsberger, C., Stephens, M., Marchini, J. & Abecasis, G. R. Fast and  
557 accurate genotype imputation in genome-wide association studies through pre-phasing.  
558 *Nat. Genet.* **44**, 955–959 (2012).
- 559 41. Durand, E. Y., Do, C. B., Mountain, J. L. & Michael Macpherson, J. Ancestry Composition:  
560 A Novel, Efficient Pipeline for Ancestry Deconvolution. *bioRxiv* 010512 (2014).  
561 doi:10.1101/010512
- 562 42. UK10K Consortium *et al.* The UK10K project identifies rare variants in health and disease.  
563 *Nature* **526**, 82–90 (2015).
- 564 43. Henn, B. M. *et al.* Cryptic distant relatives are common in both isolated and cosmopolitan  
565 genetic samples. *PLoS One* **7**, e34267 (2012).
- 566 44. Gazal, S. *et al.* Functional architecture of low-frequency variants highlights strength of

567 negative selection across coding and non-coding annotations. *Nat. Genet.* **50**, 1600–1607  
 568 (2018).

## 569 Figure and table legends

570 **Figure 1. Overview of the covariate-adjusted LD score regression.** (a) As input, cov-LDSC  
 571 takes raw genotypes of collected GWAS samples and their global principal components. (b)  
 572 cov-LDSC regresses out the ancestral components from the LD score calculation and corrects  
 573 for long-range *admixture* LD. Black and red lines indicate estimates before and after covariate  
 574 adjustment respectively (c) Adjusted heritability estimation based on GWAS association  
 575 statistics (measured by  $\chi^2$ ) and covariate-adjusted LD scores.

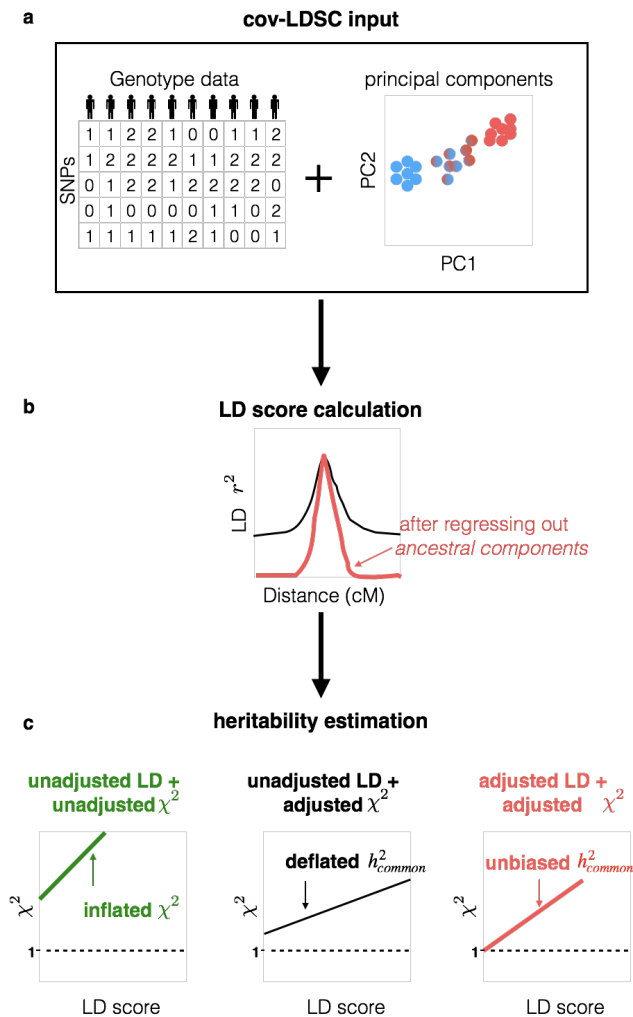

576



577 **Figure 2. Estimates of heritability ( $h_g^2$ ) under different simulation scenarios using the**  
578 **SIGMA cohort.** LDSC (orange) underestimated  $h_g^2$  and cov-LDSC (blue) yielded robust  $h_g^2$   
579 estimates under all settings. Each boxplot represents the mean LD score estimate from 100  
580 simulated phenotypes using the genotypes of 8,214 unrelated individuals from the SIGMA  
581 cohort. For cov-LDSC, a window size of 20-cM with 10 PCs were used in all scenarios. A true  
582 polygenic quantitative trait with  $h_g^2 = 0.4$  is assumed for scenarios (a), (c) and (d) and 1%  
583 causal variants are assumed for scenarios (b)-(d). (a)  $h_g^2$  estimation with varying proportions of  
584 causal variants (0.01% - 30%). (b)  $h_g^2$  estimation with varying heritabilities (0, 0.05, 0.1, 0.2,  
585 0.3, 0.4 and 0.5). (c)  $h_g^2$  estimation when an environmental stratification component aligned  
586 with the first PC of the genotype data was included in the phenotype simulation. (d)  $h_g^2$   
587 estimation when using a subset of the cohort to obtain LD score estimates and using out-of-  
588 sample LD score estimates obtained from Admixed Americans included in the 1000 Genomes  
589 Project.

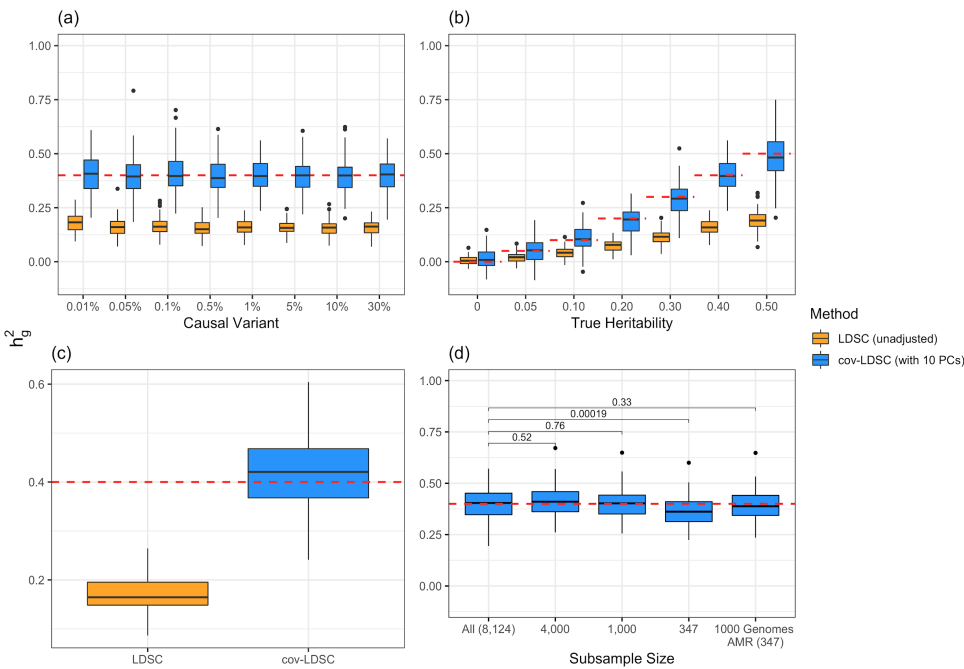

591 **Figure 3. Estimates of heritability ( $h_g^2$ ) of three quantitative and four dichotomous traits**  
 592 **in two admixed population in the 23andMe research cohort.** For seven selected non-  
 593 disease phenotypes (body mass index (BMI), height, age at menarche, left handedness,  
 594 morning person, motion sickness and nearsightedness) in the 23andMe cohort, we reported  
 595 their estimated genetic heritabilities and intercepts (and their standard errors) using the baseline  
 596 model. LD scores were calculated using 134,999, 161,894, 46,844 individuals from 23andMe  
 597 European, Latino and African American individuals respectively. For each trait, we reported  
 598 sample size used in obtained summary statistics used in cov-LDSC. For BMI and height, we  
 599 also reported the  $h_g^2$  estimates from the SIGMA cohort.

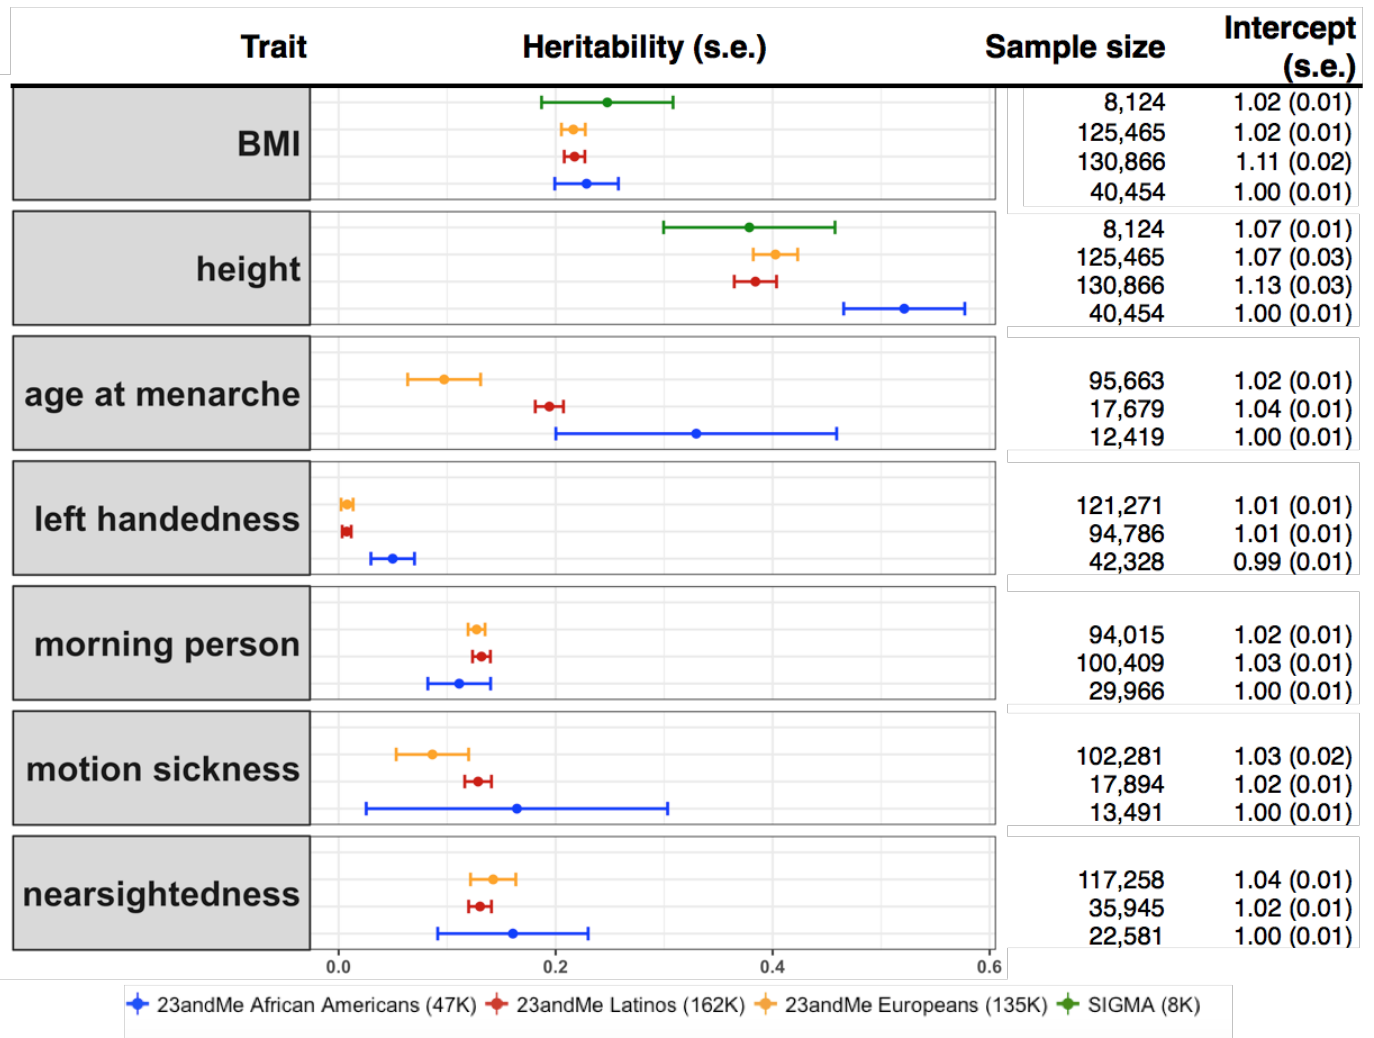

601 **Table 1.  $h_g^2$  estimates of height, body mass index (BMI) and type 2 diabetes (T2D) using**  
602 **different heritability estimation methods.** Reported values are estimates of  $h_g^2$  (with standard  
603 errors in brackets) from LDSC using a 20-cM window, cov-LDSC using a 20-cM window and 10  
604 PCs, and GCTA using REAP to obtain the genetic relationship matrix with adjustment by 10  
605 PCs. The final column provides reported  $h_g^2$  estimates in European populations from various  
606 studies<sup>4,19,20</sup>.

| <b>Phenotype</b> | <b>LDSC<br/>(baseline)</b> | <b>cov-LDSC (baseline)</b> | <b>GCTA (REAP w/ 10pc)</b> | <b>Public</b>                |
|------------------|----------------------------|----------------------------|----------------------------|------------------------------|
| <b>Height</b>    | 0.159 (0.037)              | 0.379 (0.079)              | 0.450 (0.042)              | 0.45-0.685 <sup>4,19</sup>   |
| <b>BMI</b>       | 0.113 (0.030)              | 0.248 (0.061)              | 0.235 (0.041)              | 0.246-0.27 <sup>19</sup>     |
| <b>T2D</b>       | 0.121 (0.035)              | 0.263 (0.073)              | 0.376 (0.046)              | 0.139-0.414 <sup>19,20</sup> |

607
